# Supplementary material
Source: publisher figshare collection journal article supplement (https://acs.figshare.com/ndownloader/files/3912493)
Supplement: Supplementary file 1 [file 3912493]

**Supporting Information**

**Redox-responsive Nanocarrier Based on Heparin End-capped  
Mesoporous Silica Nanoparticles for Targeted Tumor  
Therapy *in Vitro* and *in Vivo***

Liangliang Dai, Jinghua Li, Beilu Zhang, Junjie Liu, Zhong Luo and KaiyongCai\*

Key Laboratory of Biorheological Science and Technology (Chongqing University), Ministry of  
Education, College of Bioengineering, Chongqing University, Chongqing 400044, P. R. China

\* Corresponding author: Prof. Dr. Kaiyong Cai

College of Bioengineering

Chongqing University,

Chongqing 400044,

P. R. China

Tel: +86-23-65102507

Fax: +86-23-65102877

E-mail: [kaiyong\\_cai@cqu.edu.cn](mailto:kaiyong_cai@cqu.edu.cn)

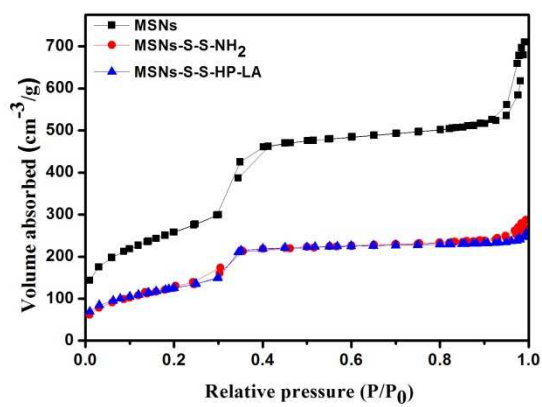

(A)

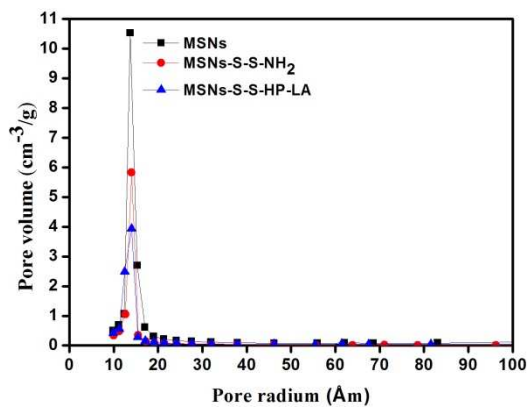

(B)

**Figure S1.** BET N<sub>2</sub> adsorption/desorption isotherms (A) and BJH pore sizes distributions (B) of MSNs, MSNs-S-S-NH<sub>2</sub> and MSNs-S-S-HP-LA, respectively.

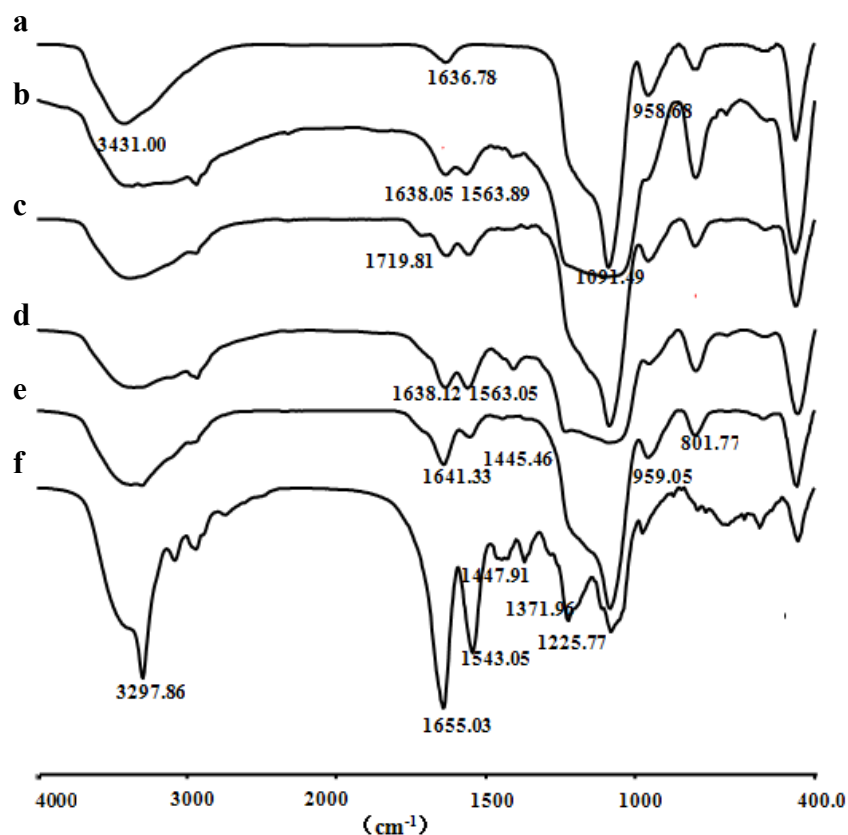

**Figure S2.** FTIR spectra of (a) MSNs, (b) MSNs-NH<sub>2</sub>, (c) MSNs-COOH, (d) MSNs-S-S-NH<sub>2</sub>, (e) MSNs-S-S-HP and (f) MSNs-S-S-HP-LA, respectively.

MSNs displayed strong absorption signals at 962 cm<sup>-1</sup> and 1092 cm<sup>-1</sup>, which were assigned to skeletal vibration of the C-O bonds, stretching and asymmetric stretching of Si-O-Si bridges, respectively. Peaks at 3431 cm<sup>-1</sup> and 1636 cm<sup>-1</sup> were attributed to physically adsorbed water molecules in MSNs (Figure S2 a). Compared to MSNs, MSNs-NH<sub>2</sub> displayed additional peaks at 1638 cm<sup>-1</sup> and 1563 cm<sup>-1</sup> (Figure S1 b), which were assigned to the stretching vibration of amide I and -NH<sub>2</sub> bending, respectively. The result suggests that amino-functionalization of MSNs

was successfully achieved. Following modification with succinic anhydride, distinctive absorption peak at  $1719\text{ cm}^{-1}$  ( $\text{C=O}$ ) was observed (Figure S1 c). The intensity of the peak at  $3400\text{ cm}^{-1}$  increased due to the introduction of carboxyl groups deriving from succinic anhydride ( $\text{MSNs-COOH}$ ). After modification with cystamine dihydrochloride, no carboxyl groups signals (around  $1719\text{ cm}^{-1}$ ) were observed in the spectrum of disulfide bond-linked  $\text{MSNs-COOH}$  ( $\text{MSNs-S-S-NH}_2$ ) (Figure S1 d). The intensities of peaks at  $1638\text{ cm}^{-1}$  and  $1556\text{ cm}^{-1}$  increased since more amide I and amide II groups were introduced after reacting with cystamine. The results indicate that disulfide bonds were covalently formed on MSNs. After covalently coupling with heparin, the distinctive characteristic absorption peaks at  $959\text{ cm}^{-1}$ ,  $801\text{ cm}^{-1}$  and  $1445\text{ cm}^{-1}$  were observed from the spectrum of  $\text{MSNs-S-S-HP}$  (Figure S1 e). The peak at  $1445\text{ cm}^{-1}$  was assigned to  $\text{SO}_3^{2-}$  stretching vibration. Compared to  $\text{MSNs-S-S-HP}$ , the intensities of amide I ( $1655\text{ cm}^{-1}$ ) and OH ( $3297\text{ cm}^{-1}$ ) increased after LA coupling to  $\text{MSNs-S-S-HP}$ . Moreover, the amide I peak of  $\text{MSNs-S-S-HP-LA}$  slightly shifted from  $1655\text{ cm}^{-1}$  to  $1641\text{ cm}^{-1}$  (Figure S1 f), which was consistent with a previous study.<sup>1</sup> All results suggest that  $\text{MSNs-S-S-HP-LA}$  was successfully synthesized.

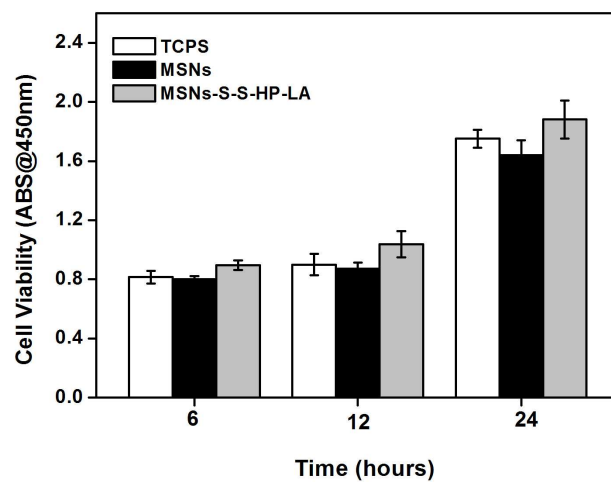

**Figure S3.** Cell viability of HepG2 treated with MSNs and MSNs-S-S-HP-LA (0.4 mg/mL) as comparing with TCPS (control).

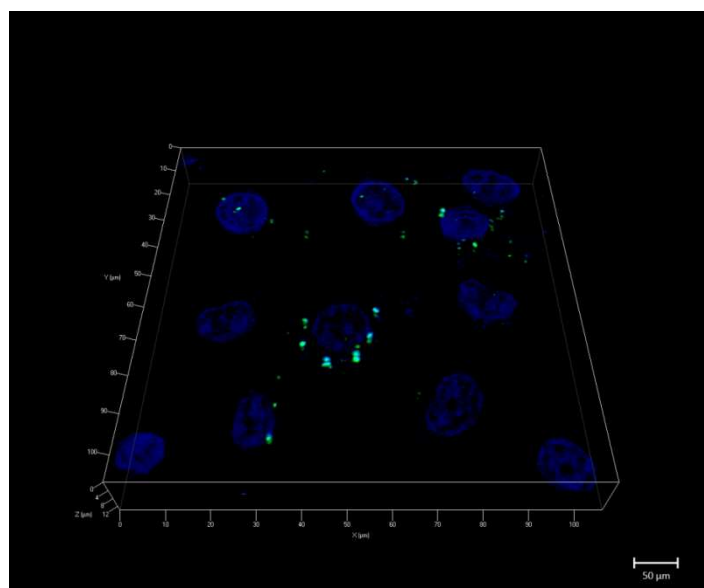

**Figure S4.** 3D reconstructed image of MSNs-S-S-HP-LA@FITC within HepG2 cells. Scar bar: 50  $\mu\text{m}$ .

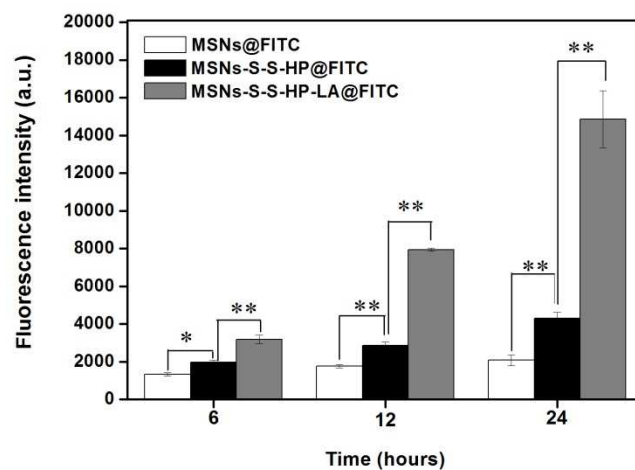

**Figure S5.** Fluorescence intensity analysis of FITC in HepG2 cells after treating with MSNs@FITC, MSNs-S-S-HP@FITC, and MSNs-S-S-HP@FITC for 6, 12 and 24 h, respectively. Error bars represent means  $\pm$  SD (n=3), \*p < 0.05, \*\*p < 0.01.

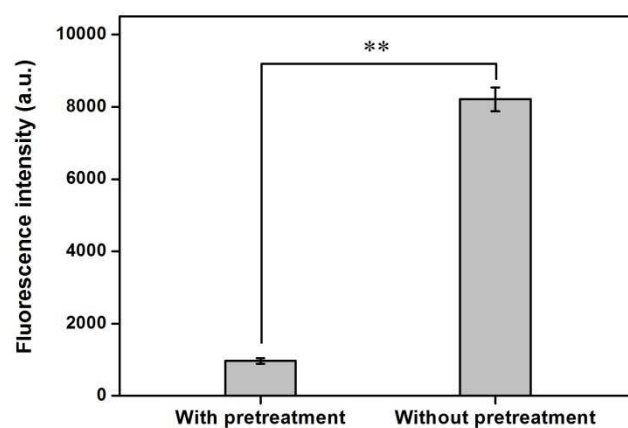

**Figure S6.** Fluorescence intensity analysis of FITC in HepG2 cells pretreated with or without galactose for 2 h and then incubated with 0.4 mg/mL MSNs-S-S-HP-LA@FITC at 37 °C for 24 h. Error bars represent means  $\pm$  SD (n=3), \*\*p < 0.01.



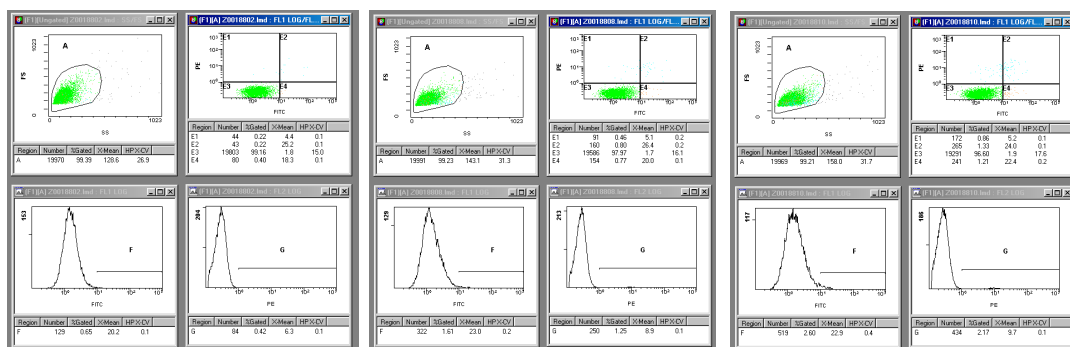

(a)

(b)

(c)

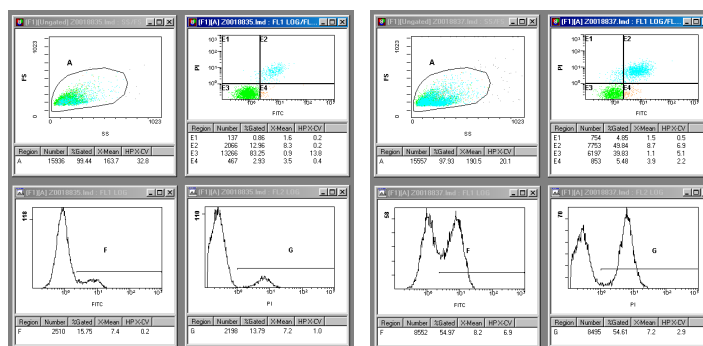

(d)

(e)

**Figure S7.** Flow cytometry analysis of HepG2 cells after culture with TCPS (control, a) and 0.4 mg/mL of MSNs (b), 20 µg/mL of HP (c) and DOX(d), and the same amount of DOX loaded MSNs-S-S-HP-LA@DOX (e) (0.4 mg/mL) at 37°C for 24 h.

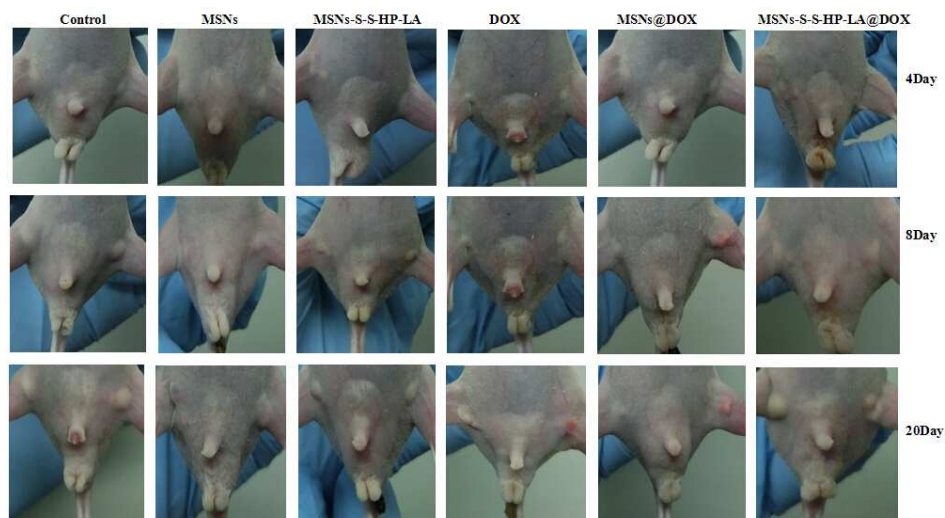

**Figure S8.** Representative photos of tumor-bearing mice after treatment for 20 days. The tumor was bore at groin both side of mice. The tumors at right side of mice were treated with different methods, while the tumors at left side of mice was only treated with PBS.

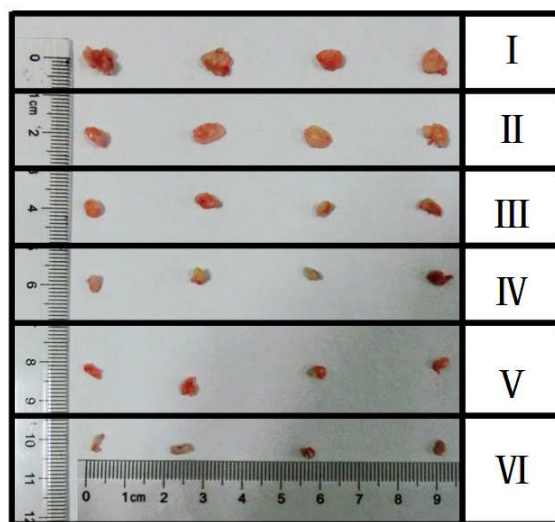

**Figure S9.** Representative images of the substantial tumors treated with PBS as control ( I ), MSNs( II ), MSNs-S-S-HP-LA ( III ), DOX ( IV ), MSNs@DOX ( V ), and MSNs-S-S-HP-LA@DOX ( VI ), respectively. Scale bar: 1cm.

**Table S1.** BET and BJH parameters of MSNs, MSNs-S-NH<sub>2</sub> and MSNs-S-S-HP-LA.

| Materials                | S <sub>BET</sub> (m <sup>2</sup> /g) | V <sub>P</sub> (cm <sup>3</sup> /g) | BJH W <sub>BJH</sub> ( Å ) |
|--------------------------|--------------------------------------|-------------------------------------|----------------------------|
| MSNs                     | 933.6754                             | 0.903569                            | 38.7102                    |
| MSNs-S-S-NH <sub>2</sub> | 463.4716                             | 0.390173                            | 33.6739                    |
| MSNs-S-S-HP-LA           | 435.7575                             | 0.367462                            | 32.2369                    |

**Table S2.** Zeta potentials variation recorded at various stages of MSNs-S-S-HP-LA fabrication.

| Materials                | Zeta potential (mV) |
|--------------------------|---------------------|
| MSNs                     | -23.5±4.73          |
| MSNs-NH <sub>2</sub>     | 35.6±6.74           |
| MSNs-COOH                | -30.3±7.7           |
| MSNs-S-S-NH <sub>2</sub> | 18±7.85             |
| MSNs-S-S-HP              | -20.5±6.17          |
| MSNs-S-S-HP-LA           | -25.1±6.69          |

**Table S3.** The apoptosis percentage of HepG2 cells with different treatments (control, MSNs, HP, DOX, and MSNs-S-S-HP-LA@DOX) calculated from flow cytometry analysis.

| Materials          | Apoptosis percentage (%) |
|--------------------|--------------------------|
| TCPS               | 0.65                     |
| MSNs               | 1.61                     |
| HP                 | 2.6                      |
| DOX                | 13                       |
| MSNs-S-S-HP-LA@DOX | 56                       |

## Reference

- [1]Cai, K. Y.; Hu, Y.; Luo, Z.; Kong, T.; Lai, M.; Sui, X. J.; Wang, Y. L.; Yang, L.; Deng, L. H. Cell-Specific Gene Transfection from a Gene-Functionalized Poly(d,l-lactic acid) Substrate Fabricated by the Layer-by-Layer Assembly Technique. *Angew. Chem. Int. Ed.* **2008**, *47*, 7479-7481.
